# Supplementary material for: Spatio-Temporal Epidemiology of Viral Hepatitis in China (2003–2015): Implications for Prevention and Control Policies
Source: MDPI journal article supplement (doi:10.3390/ijerph15040661), 2018-04-02
Supplement: s1 [file s1]

|                            | Global Moran's I                                                                                                                                                                                                                                                                                                                                                                                                                                                                                                                                                                                                                                                                                                                                                                                                   | Local Moran's I                                                                                                                                                                                                                                                                                                                                                        |
|----------------------------|--------------------------------------------------------------------------------------------------------------------------------------------------------------------------------------------------------------------------------------------------------------------------------------------------------------------------------------------------------------------------------------------------------------------------------------------------------------------------------------------------------------------------------------------------------------------------------------------------------------------------------------------------------------------------------------------------------------------------------------------------------------------------------------------------------------------|------------------------------------------------------------------------------------------------------------------------------------------------------------------------------------------------------------------------------------------------------------------------------------------------------------------------------------------------------------------------|
| <b>Definition</b>          | Indicator which reveals the spatial autocorrelation at the global level.                                                                                                                                                                                                                                                                                                                                                                                                                                                                                                                                                                                                                                                                                                                                           | Indicator which reveals the spatial autocorrelation at the local level.                                                                                                                                                                                                                                                                                                |
| <b>Usage in this study</b> | To reveal the overall agglomerating level of the incidence of viral hepatitis across the space.                                                                                                                                                                                                                                                                                                                                                                                                                                                                                                                                                                                                                                                                                                                    | To identify the spatial clusters of the incidence of viral hepatitis across the space.                                                                                                                                                                                                                                                                                 |
| <b>Formula</b>             | $\text{Global Moran's I} = \frac{n \sum_{i=1}^n \sum_{j=1}^n W_{ij} (x_i - \bar{x})(x_j - \bar{x})}{(\sum_{i=1}^n \sum_{j=1}^n W_{ij}) \sum_{i=1}^n (x_i - \bar{x})^2}$                                                                                                                                                                                                                                                                                                                                                                                                                                                                                                                                                                                                                                            | $\text{Local Moran's I} = \frac{(x_i - \bar{x})}{m_0} \sum_j W_{ij} (x_j - \bar{x})$ $m_0 = \sum_i (x_i - \bar{x})^2 / n.$                                                                                                                                                                                                                                             |
| <b>Explanations</b>        | <p><math>x_i</math>—the incidence of viral hepatitis in provincial unit i.</p> <p><math>x_j</math>—the incidence of viral hepatitis in provincial unit j.</p> <p><math>\bar{x}</math>—the mean value of the incidence of viral hepatitis at the provincial level.</p> <p><math>W_{ij}</math>—row-standardized 31×31 spatial weight matrix, which contains the geographical information of research target observation units. It is defined as follows:</p> $W_{ij} = \begin{bmatrix} W_{11} & W_{12} & \dots & W_{1,30} & W_{1,31} \\ W_{21} & W_{22} & & W_{2,30} & W_{2,31} \\ & \vdots & & & \vdots \\ W_{30,1} & W_{30,2} & \dots & W_{30,30} & W_{30,29} \\ W_{31,1} & W_{31,2} & & W_{31,30} & W_{31,31} \end{bmatrix} \quad W_{ij} = \begin{cases} 1 & \text{adjacent} \\ 0 & \text{otherwise} \end{cases}$ | <p><math>x_i</math>—the incidence of viral hepatitis in provincial unit i.</p> <p><math>x_j</math>—the incidence of viral hepatitis in provincial unit j.</p> <p>j—the number of adjacent units of unit i, which indicates that the sum of j will be limited to the adjacent units of i.</p> <p><math>W_{ij}</math> shares the same meaning with Global Moran's I.</p> |
