# Supplementary material for: Spatio-Temporal Epidemiology of Viral Hepatitis in China (2003–2015): Implications for Prevention and Control Policies
Source: MDPI journal article supplement (doi:10.3390/ijerph15040661), 2018-04-02
Supplement: s1 [file s1]

**Table S4** The chi-square and P-value results for linear by linear association test.

| Region       | Hepatitis A          |              | Hepatitis B          |              | Hepatitis C          |              | Hepatitis E          |              | Hepatitis non A-E    |              |
|--------------|----------------------|--------------|----------------------|--------------|----------------------|--------------|----------------------|--------------|----------------------|--------------|
|              | Chi-square (P-value) |              |
|              | 2003-2009            | 2009-2015    | 2003-2009            | 2009-2015    | 2003-2009            | 2009-2015    | 2003-2009            | 2009-2015    | 2003-2009            | 2009-2015    |
| Beijing      | 5.676(0.017)         | 2.436(0.119) | 0.003(0.957)         | 5.709(0.017) | 3.826(0.050)         | 5.463(0.019) | 0.113(0.736)         | 5.111(0.024) | 5.348(0.021)         | 4.905(0.027) |
| Tianjin      | 5.172(0.023)         | 1.579(0.209) | 0.060(0.806)         | 5.309(0.021) | 0.896(0.344)         | 0.247(0.619) | 3.378(0.066)         | 5.357(0.021) | 4.573(0.032)         | 5.491(0.019) |
| Hebei        | 5.807(0.016)         | 3.396(0.065) | 4.186(0.041)         | 0.729(0.393) | 5.865(0.015)         | 5.935(0.015) | 0.100(0.752)         | 1.340(0.247) | 4.894(0.027)         | 4.983(0.026) |
| Shanxi       | 4.862(0.027)         | 4.363(0.037) | 5.027(0.025)         | 0.595(0.440) | 5.896(0.015)         | 5.373(0.020) | 2.451(0.117)         | 4.433(0.035) | 1.334(0.248)         | 2.946(0.086) |
| Neimenggu    | 5.220(0.022)         | 2.313(0.128) | 4.619(0.032)         | 5.047(0.025) | 5.980(0.014)         | 4.447(0.035) | 0.854(0.355)         | 4.673(0.031) | 2.029(0.154)         | 5.004(0.025) |
| Liaoning     | 4.880(0.027)         | 1.703(0.192) | 4.358(0.037)         | 5.243(0.022) | 5.908(0.015)         | 4.987(0.026) | 3.684(0.055)         | 3.092(0.079) | 4.781(0.029)         | 5.498(0.019) |
| Jilin        | 5.504(0.019)         | 3.941(0.047) | 5.401(0.020)         | 5.128(0.124) | 5.704(0.017)         | 2.432(0.119) | 0.223(0.636)         | 0.217(0.641) | 5.653(0.017)         | 5.198(0.023) |
| Heilongjiang | 5.423(0.020)         | 4.112(0.043) | 1.931(0.165)         | 5.693(0.017) | 5.060(0.024)         | 0.097(0.756) | 0.000(0.992)         | 4.639(0.031) | 4.149(0.042)         | 5.697(0.017) |
| Shanghai     | 5.590(0.018)         | 2.334(0.127) | 1.859(0.173)         | 0.950(0.330) | 5.500(0.019)         | 4.763(0.029) | 2.399(0.121)         | 1.057(0.304) | 3.891(0.049)         | 5.397(0.020) |
| Jiangsu      | 4.910(0.027)         | 4.606(0.032) | 0.804(0.370)         | 0.625(0.429) | 4.991(0.025)         | 5.591(0.018) | 4.435(0.035)         | 0.853(0.356) | 5.324(0.021)         | 4.868(0.027) |
| Zhejiang     | 5.020(0.025)         | 4.778(0.029) | 1.246(0.264)         | 5.282(0.022) | 5.683(0.017)         | 1.175(0.278) | 2.703(0.100)         | 2.428(0.119) | 4.525(0.033)         | 5.489(0.019) |
| Anhui        | 5.092(0.024)         | 4.906(0.027) | 4.267(0.039)         | 3.373(0.066) | 5.689(0.017)         | 5.973(0.015) | 5.416(0.020)         | 0.325(0.568) | 0.303(0.582)         | 0.452(0.502) |
| Fujian       | 5.238(0.022)         | 4.808(0.028) | 5.666(0.017)         | 3.218(0.073) | 5.666(0.017)         | 5.153(0.023) | 4.796(0.029)         | 0.389(0.533) | 5.442(0.020)         | 4.603(0.032) |
| Jiangxi      | 5.479(0.019)         | 5.069(0.024) | 2.299(0.129)         | 1.333(0.248) | 5.711(0.017)         | 5.677(0.017) | 5.476(0.019)         | 1.970(0.160) | 2.013(0.156)         | 5.115(0.024) |
| Shandong     | 5.733(0.017)         | 0.945(0.331) | 0.001(0.980)         | 4.812(0.028) | 5.446(0.020)         | 5.779(0.016) | 1.649(0.199)         | 0.029(0.864) | 4.283(0.038)         | 5.034(0.025) |
| Henan        | 3.930(0.047)         | 5.274(0.022) | 4.995(0.025)         | 5.195(0.023) | 5.979(0.014)         | 0.099(0.753) | 4.543(0.033)         | 2.696(0.101) | 2.458(0.117)         | 5.672(0.017) |
| Hubei        | 5.560(0.018)         | 4.841(0.028) | 5.700(0.017)         | 4.726(0.030) | 5.898(0.015)         | 5.895(0.015) | 4.714(0.030)         | 5.058(0.025) | 0.230(0.652)         | 5.805(0.016) |
| Hunan        | 1.875(0.174)         | 4.922(0.027) | 5.346(0.021)         | 4.982(0.026) | 5.679(0.017)         | 5.827(0.016) | 5.274(0.022)         | 3.968(0.046) | 4.251(0.039)         | 2.118(0.146) |
| Guangdong    | 2.428(0.119)         | 0.183(0.668) | 5.515(0.019)         | 0.026(0.872) | 5.984(0.014)         | 4.830(0.028) | 5.862(0.015)         | 0.318(0.573) | 1.675(0.196)         | 3.983(0.046) |
| Guangxi      | 3.048(0.081)         | 4.474(0.034) | 5.145(0.023)         | 0.019(0.891) | 5.884(0.015)         | 0.629(0.428) | 5.636(0.018)         | 5.490(0.019) | 0.542(0.462)         | 2.004(0.157) |
| Hainan       | 2.542(0.111)         | 5.510(0.019) | 0.063(0.803)         | 5.485(0.019) | 5.802(0.016)         | 5.714(0.017) | 5.773(0.016)         | 4.914(0.029) | 4.261(0.039)         | 5.172(0.023) |
| Chongqing    | 5.699(0.017)         | 3.946(0.047) | 0.071(0.790)         | 0.507(0.476) | 5.711(0.017)         | 5.925(0.015) | 4.184(0.041)         | 5.260(0.022) | 4.559(0.033)         | 5.691(0.017) |
| Sichuan      | 4.783(0.029)         | 5.671(0.017) | 0.221(0.638)         | 5.675(0.017) | 5.648(0.017)         | 5.126(0.024) | 4.145(0.042)         | 3.705(0.054) | 4.348(0.037)         | 5.869(0.015) |
| Guizhou      | 0.946(0.331)         | 4.602(0.032) | 5.719(0.017)         | 4.105(0.043) | 5.496(0.019)         | 5.861(0.015) | 0.197(0.657)         | 4.824(0.028) | 1.138(0.286)         | 5.835(0.016) |
| Yunnan       | 2.823(0.093)         | 4.546(0.033) | 3.447(0.063)         | 0.670(0.413) | 5.950(0.015)         | 5.888(0.015) | 4.928(0.026)         | 5.086(0.024) | 4.212(0.040)         | 5.593(0.018) |
| Xizang       | 0.000(0.989)         | 0.135(0.713) | 1.639(0.200)         | 5.458(0.019) | 0.361(0.548)         | 2.622(0.105) | 0.285(0.593)         | 0.103(0.749) | 4.539(0.033)         | 2.327(0.127) |
| Shaanxi      | 4.873(0.027)         | 4.597(0.032) | 3.943(0.047)         | 4.439(0.035) | 4.712(0.030)         | 5.836(0.016) | 3.750(0.053)         | 0.782(0.377) | 5.075(0.024)         | 5.746(0.017) |
| Gansu        | 2.446(0.118)         | 4.612(0.032) | 4.791(0.029)         | 5.416(0.020) | 5.640(0.018)         | 0.114(0.736) | 5.488(0.019)         | 2.773(0.096) | 1.394(0.238)         | 4.247(0.039) |
| Qinghai      | 0.742(0.389)         | 3.810(0.051) | 5.522(0.019)         | 4.831(0.028) | 5.594(0.018)         | 1.843(0.175) | 4.352(0.037)         | 2.912(0.088) | 4.233(0.040)         | 3.664(0.056) |
| Ningxia      | 0.000(0.989)         | 3.653(0.056) | 1.329(0.249)         | 4.135(0.042) | 5.686(0.017)         | 4.774(0.029) | 4.224(0.040)         | 1.284(0.257) | 1.929(0.165)         | 5.048(0.025) |
| Xinjiang     | 0.018(0.894)         | 0.997(0.318) | 5.201(0.023)         | 3.741(0.053) | 5.847(0.016)         | 2.623(0.105) | 4.077(0.043)         | 5.086(0.024) | 1.948(0.163)         | 1.849(0.074) |
| SUM          | 5.260(0.022)         | 4.738(0.030) | 4.916(0.027)         | 5.199(0.023) | 5.980(0.014)         | 5.008(0.025) | 4.025(0.045)         | 1.132(0.287) | 4.630(0.031)         | 5.904(0.015) |
